# Supplementary material for: Actualidad del crédito bancario sindicado
Source: MDPI journal article supplement (doi:10.3390/ph17050576), 1987-01-01
Supplement: s1 [file s1]

# Chlorin Conjugates in Photodynamic Chemotherapy for Triple-Negative Breast Cancer

## Supplementary Material

**Table S1. Toxicology Data of the Chemotherapeutic Drugs Used in this Study.**

| Chemotherapeutic Drug | Hazards from SDS Sheets                                                                                                                                                                                                       | Toxicity <sup>1a</sup> Health Code | LD <sub>50</sub> (literature) |
|-----------------------|-------------------------------------------------------------------------------------------------------------------------------------------------------------------------------------------------------------------------------|------------------------------------|-------------------------------|
| Taxol                 | Cause skin irritation, serious eye damage, respiratory irritation, suspected of damaging fertility or the unborn child                                                                                                        | 2                                  | 32.5 mg/kg <sup>2a</sup>      |
| Doxorubicin           | Cause skin irritation, serious eye damage, respiratory irritation, may cause genetic defects, may cause cancer, suspected of damaging fertility, suspected of damaging the unborn child                                       | 4                                  | 570 mg/kg <sup>2a</sup>       |
| Cisplatin             | Fatal if swallowed, causes skin irritation, and serious eye damage, may cause respiratory irritation, may cause cancer, harmful in contact with skin or if inhaled                                                            | 2                                  | 25.8 mg/kg <sup>2b</sup>      |
| 5-Fluorouracil        | Toxic if swallowed, cause skin irritation, serious eye irritation, may cause respiratory irritation, suspected of causing genetic defects, suspected of damaging the unborn child, harmful in contact with skin or if inhaled | 3                                  | 230 mg/kg <sup>2c</sup>       |
| Methotrexate          | Toxic if swallowed, cause skin irritation, serious eye irritation, may cause respiratory irritation, may cause genetic defects, may damage fertility, may damage the unborn child                                             | 3                                  | 135 mg/kg <sup>2c</sup>       |

<sup>1a</sup>Acute Oral Toxicity. Table VII.1.1. OSHA. <https://www.osha.gov/sites/default/files/publications/OSHA3844.pdf>. Last accessed 12/03/23.

**Table S2. Acute Oral Toxicity Categories and Classification Criteria<sup>1b</sup>**

| Classification Criteria | Category 1           | Category 2                   | Category 3                     | Category 4                       |
|-------------------------|----------------------|------------------------------|--------------------------------|----------------------------------|
| Oral LD <sub>50</sub>   | ≤ 5 mg/kg bodyweight | >5 and ≤ 50 mg/kg bodyweight | >50 and ≤ 300 mg/kg bodyweight | >300 and ≤ 2000 mg/kg bodyweight |

<sup>1b</sup>Derived from Table VII.1.1. OSHA. <https://www.osha.gov/sites/default/files/publications/OSHA3844.pdf>. Last accessed 12/03/23.

LD<sub>50</sub> = median lethal dose in rat (intraperitoneal)<sup>2a</sup>, in mouse (oral)<sup>2b</sup>, and in rat (oral)<sup>2c</sup> based on SDS (Safety Data Sheets):  
 Paclitaxel SDS: Last accessed 12/03/23.

<https://www.fishersci.com/store/msds?partNumber=AC328420250&productDescription=PACLITAXEL+99%2B%25+25MGPACLITAXE&vendorId=VN00032119&countryCode=US&language=en>

Doxorubicin SDS: Last accessed 12/03/23.

<https://www.fishersci.com/store/msds?partNumber=AAJ64000MF&productDescription=DOXORUBICIN+HYDROCHLORIDE+50MG&vendorId=VN00024248&countryCode=US&language=en>; [https://cdn.pfizer.com/pfizercom/products/material\\_safety\\_data/PZ00059.pdf](https://cdn.pfizer.com/pfizercom/products/material_safety_data/PZ00059.pdf)

Cisplatin SDS: Last accessed 12/03/23.

<https://www.fishersci.com/store/msds?partNumber=AC193760050&countryCode=US&language=en>

Fluorouracil SDS: Last accessed 12/03/23.

<https://www.fishersci.com/store/msds?partNumber=AC228440250&productDescription=5-FLUOROURACIL%2C+99%25+25GR&vendorId=VN00032119&countryCode=US&language=en>

Methotrexate SDS: Last accessed 12/03/23.

<https://www.fishersci.com/store/msds?partNumber=AAJ6307503&productDescription=METHOTREXATE+1G&vendorId=VN00024248&countryCode=US&language=en>

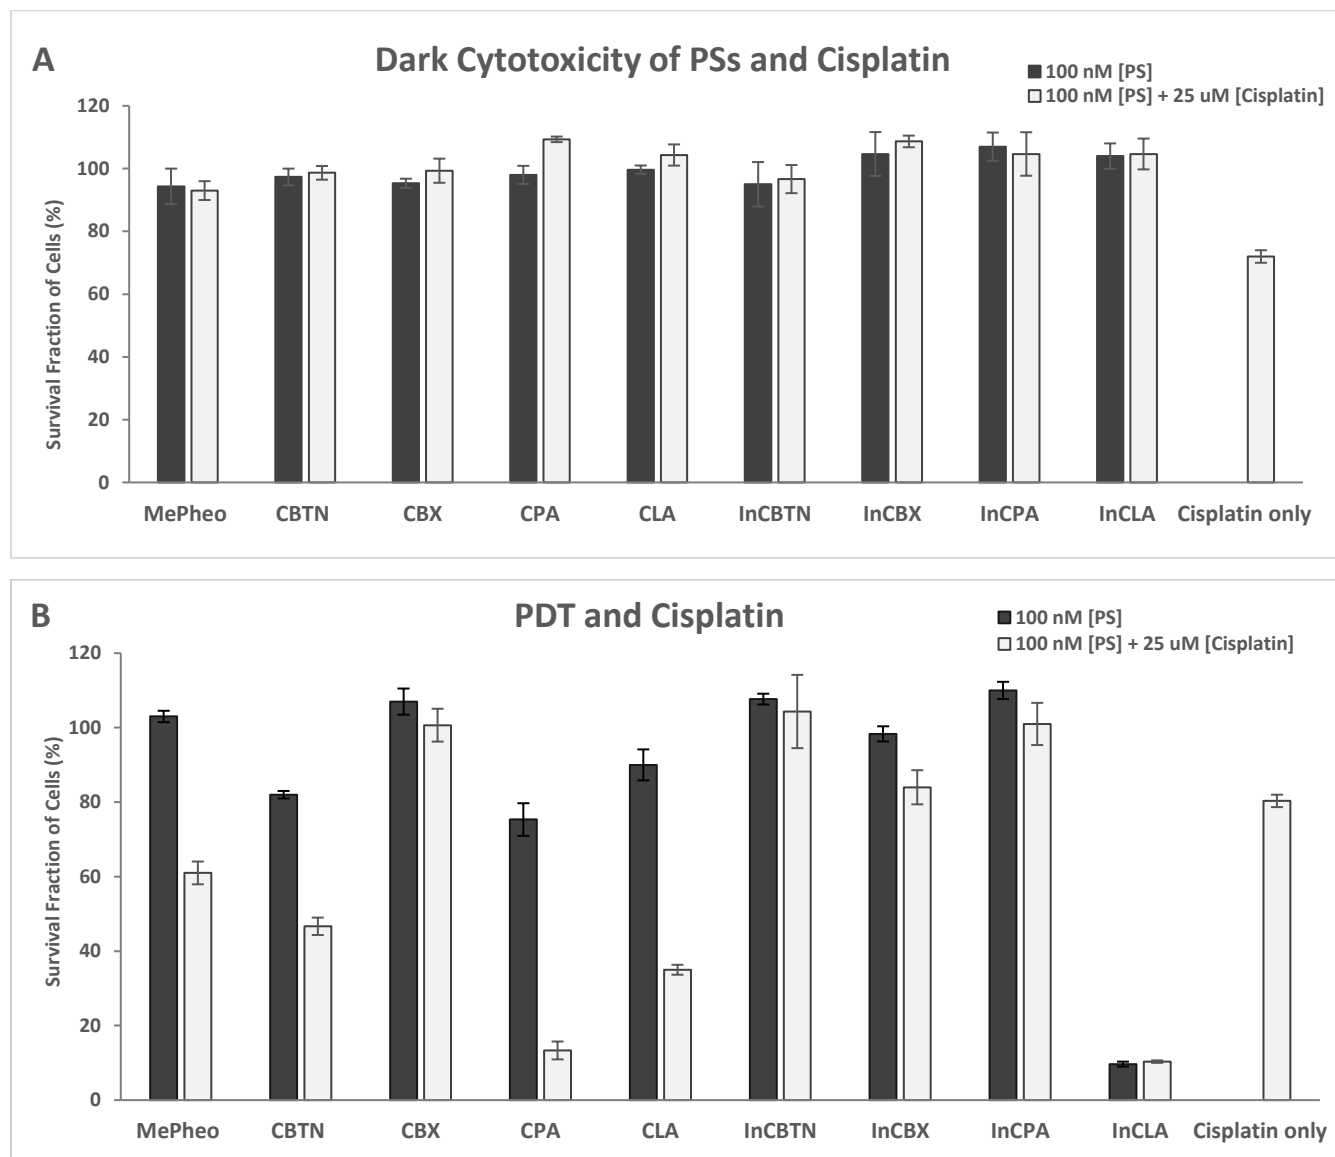

**Figure S1.** Cell survival assay of TNBC cells treated with photosensitizers at 100 nM and at 100 nM co-treated with 25  $\mu$ M cisplatin in the dark (A), in the presence of light (B), and compared to cisplatin-only treated cells.

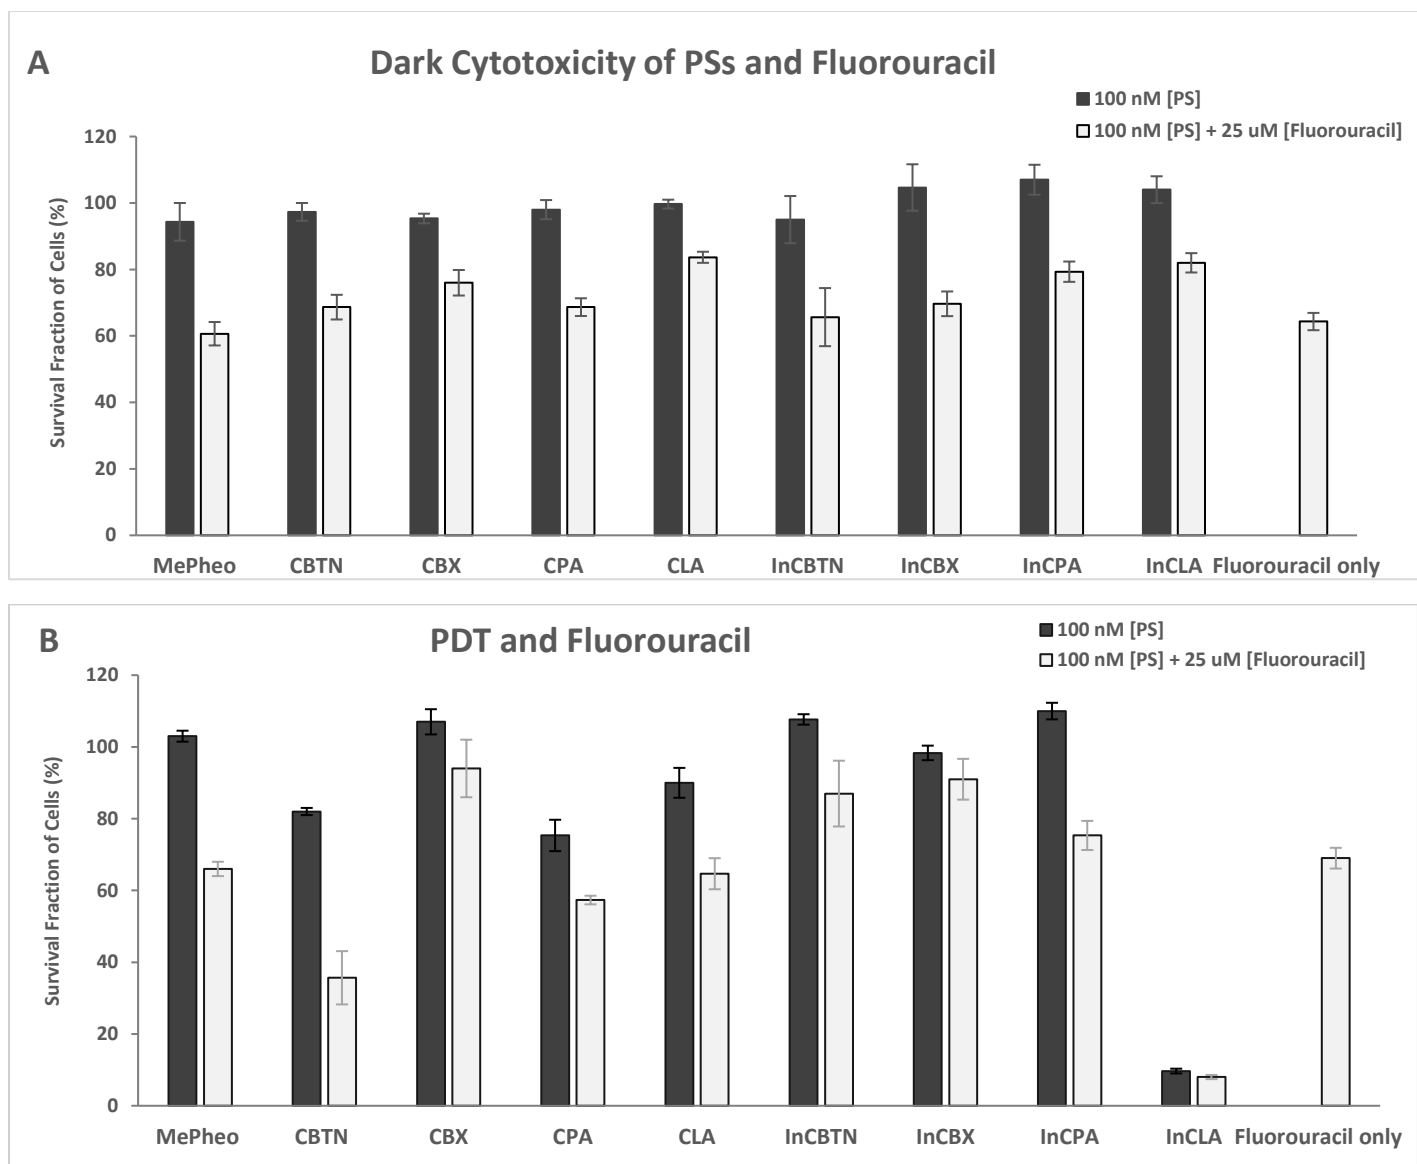

**Figure S2.** Cell survival assay of TNBC cells treated with photosensitizers at 100 nM and at 100 nM co-treated with 25  $\mu$ M fluorouracil in the dark (A), in the presence of light (B), and compared to fluorouracil-only treated cells.

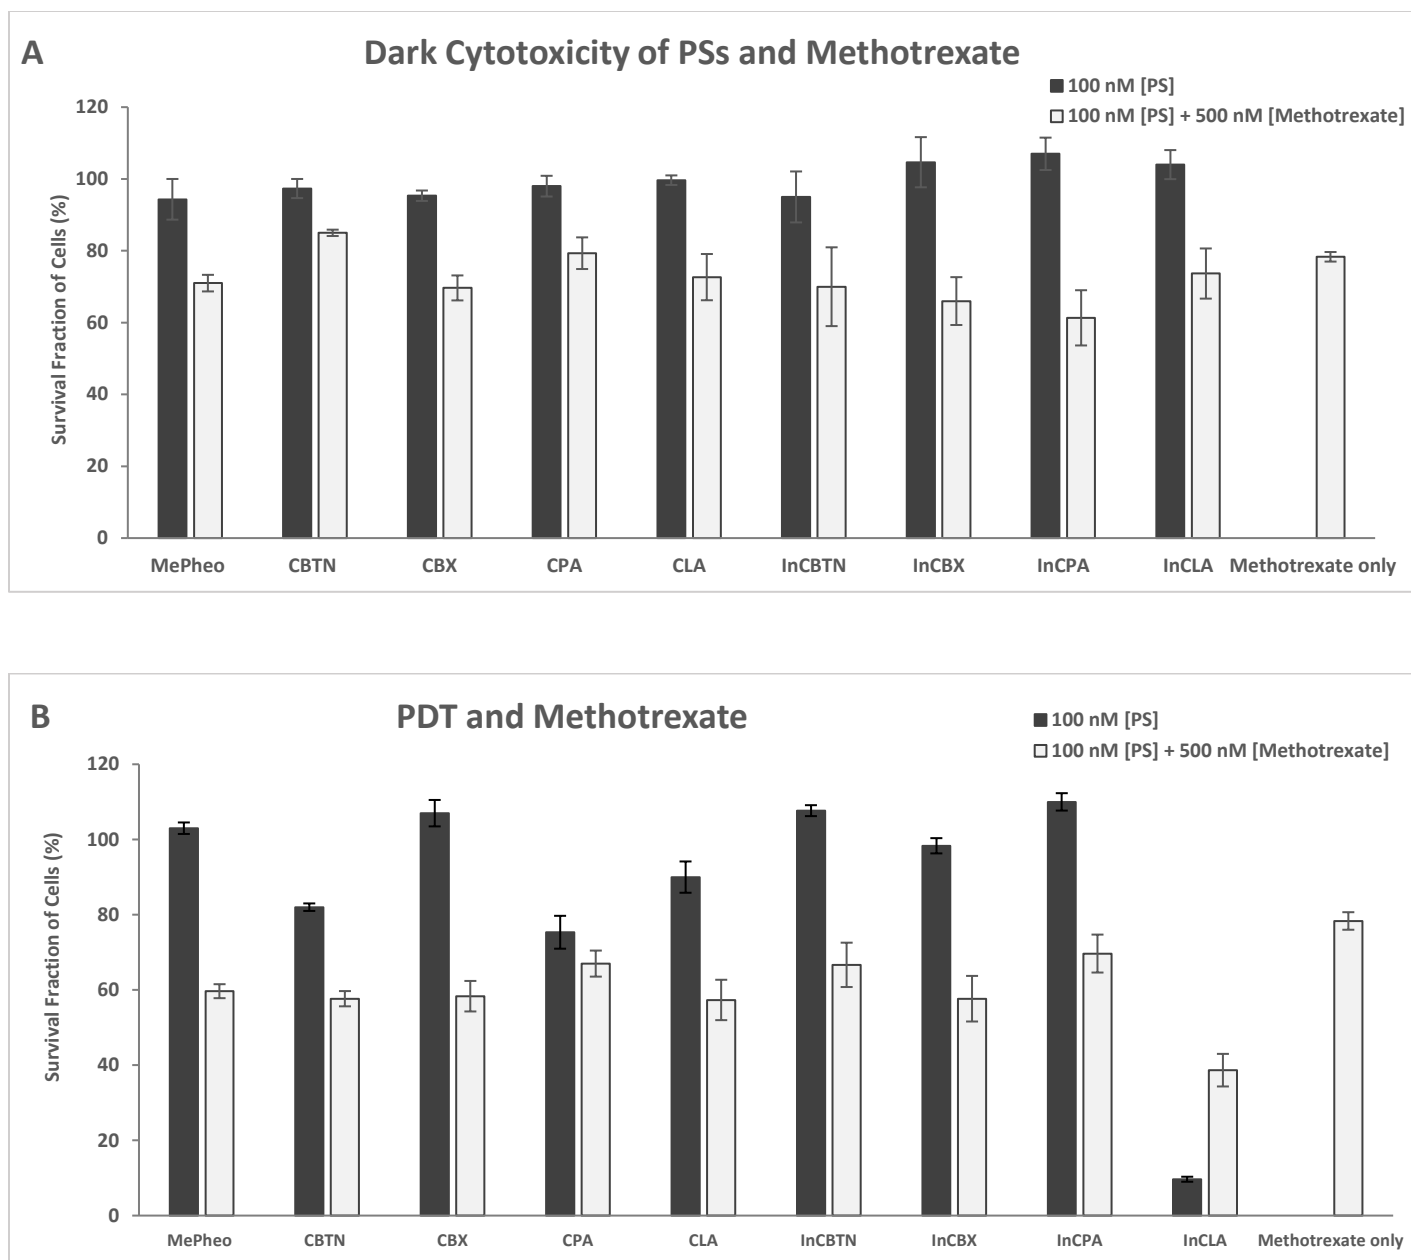

**Figure S3.** Cell survival assay of TNBC cells treated with photosensitizers at 100 nM and at 100 nM co-treated with 500 nM methotrexate in the dark (A), in the presence of light (B), and compared to methotrexate-only treated cells.
